# Supplementary material for: Time-Dependent DNA Origami Denaturation by Guanidinium Chloride, Guanidinium Sulfate, and Guanidinium Thiocyanate
Source: MDPI journal article supplement (doi:10.3390/ijms23158547), 2022-08-01
Supplement: s1 [file s1]

# Supplementary Materials

*Article*

## **Time-Dependent DNA Origami Denaturation by Guanidinium Chloride, Guanidinium Sulfate, and Guanidinium Thiocyanate**

**Marcel Hanke <sup>†</sup>, Niklas Hansen <sup>†,‡</sup>, Emilia Tomm, Guido Grundmeier and Adrian Keller <sup>\*</sup>**

Technical and Macromolecular Chemistry, Paderborn University, Warburger Str. 100, 33098 Paderborn, Germany; marcelha@mail.uni-paderborn.de (M.H.); niklashansen94@aol.de (N.H.);

emiliat@mail.uni-paderborn.de (E.T.); g.grundmeier@tc.uni-paderborn.de (G.G.)

<sup>\*</sup> Correspondence: adrian.keller@uni-paderborn.de; Tel.: +49-5251-60-5722

<sup>†</sup> These authors contributed equally to this work.

<sup>‡</sup> Present address: Department of Biophysical Chemistry, J. Heyrovsky Institute of Physical Chemistry, Czech Academy of Sciences, Dolejškova 3, 182 23 Prague 8, Czech Republic.

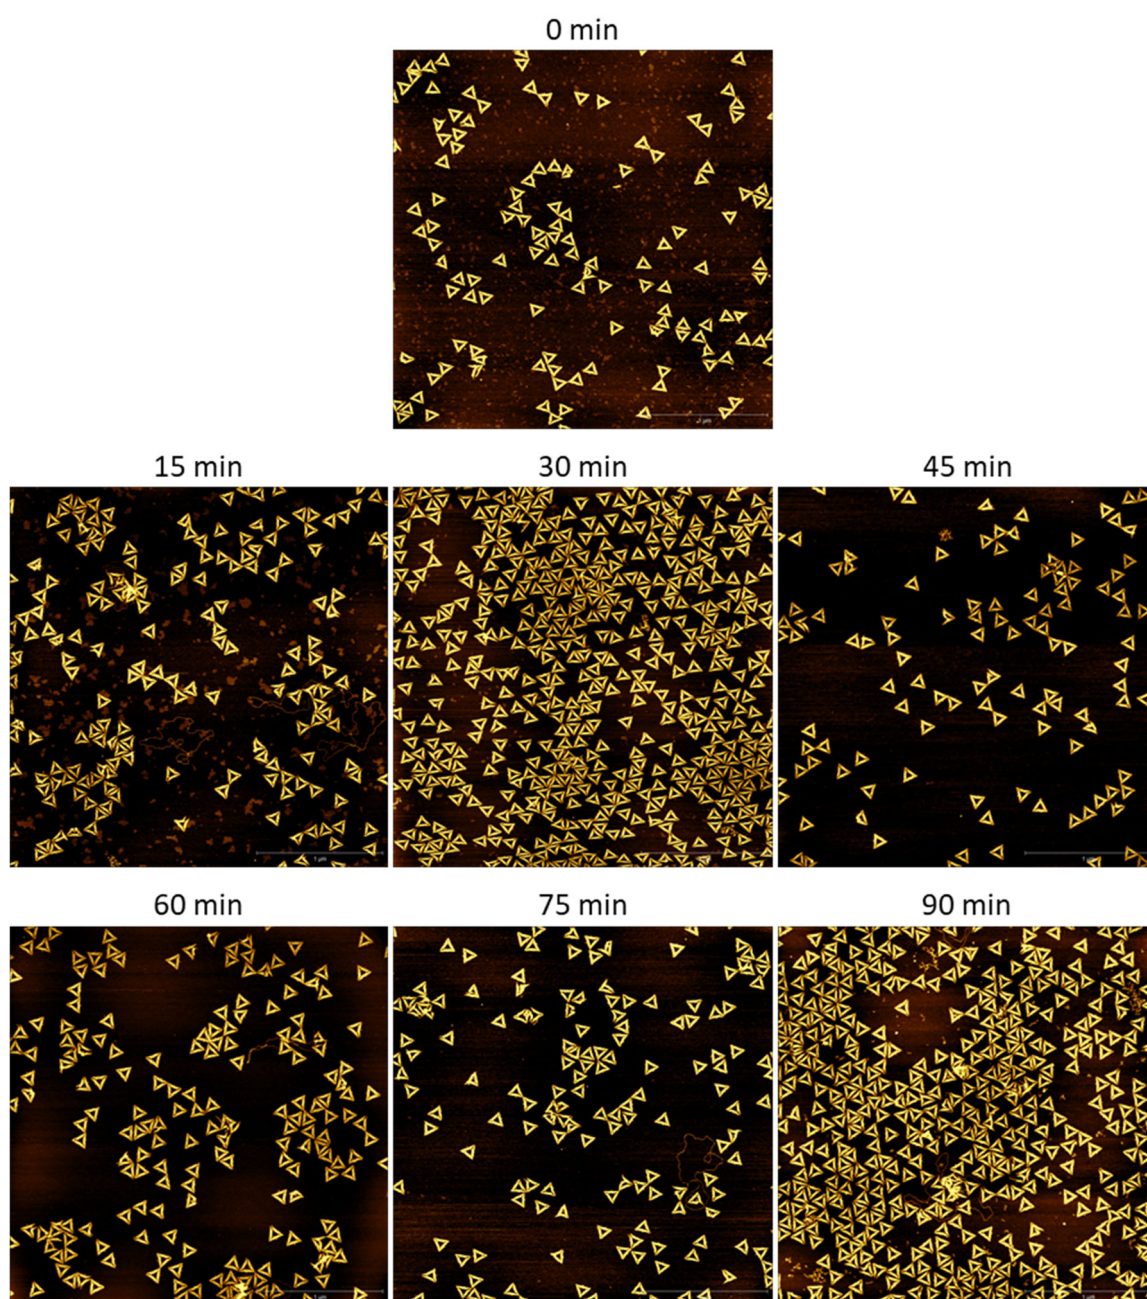

**Figure S1:** Additional AFM images of DNA origami triangles exposed to GdmCl at 25 °C.

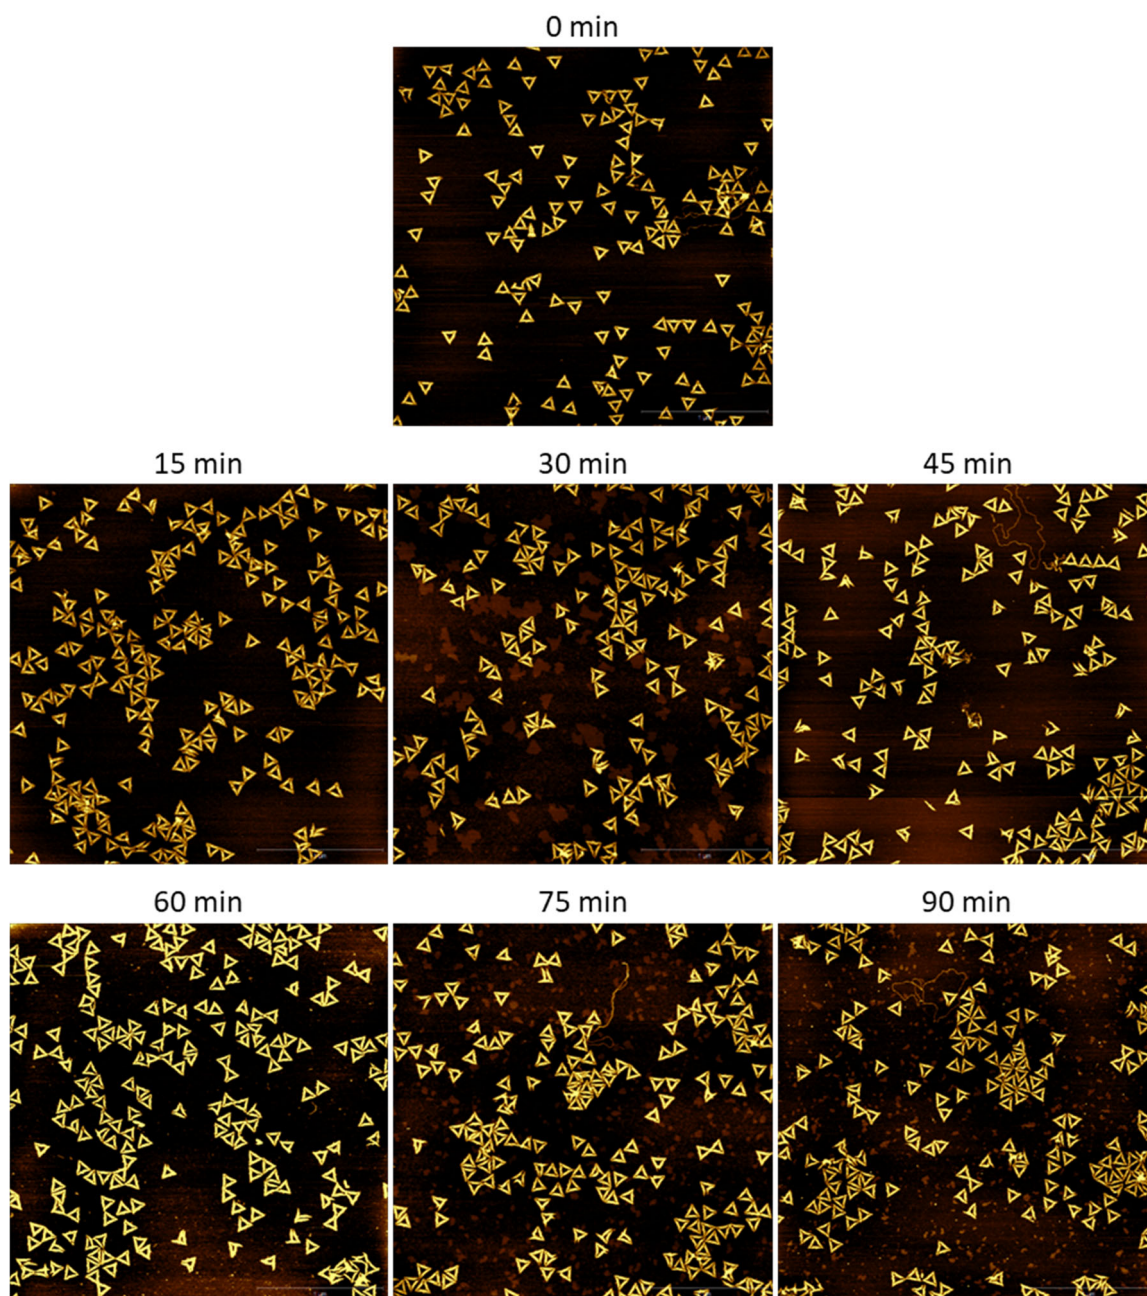

**Figure S2:** Additional AFM images of DNA origami triangles exposed to GdmCl at 40 °C.

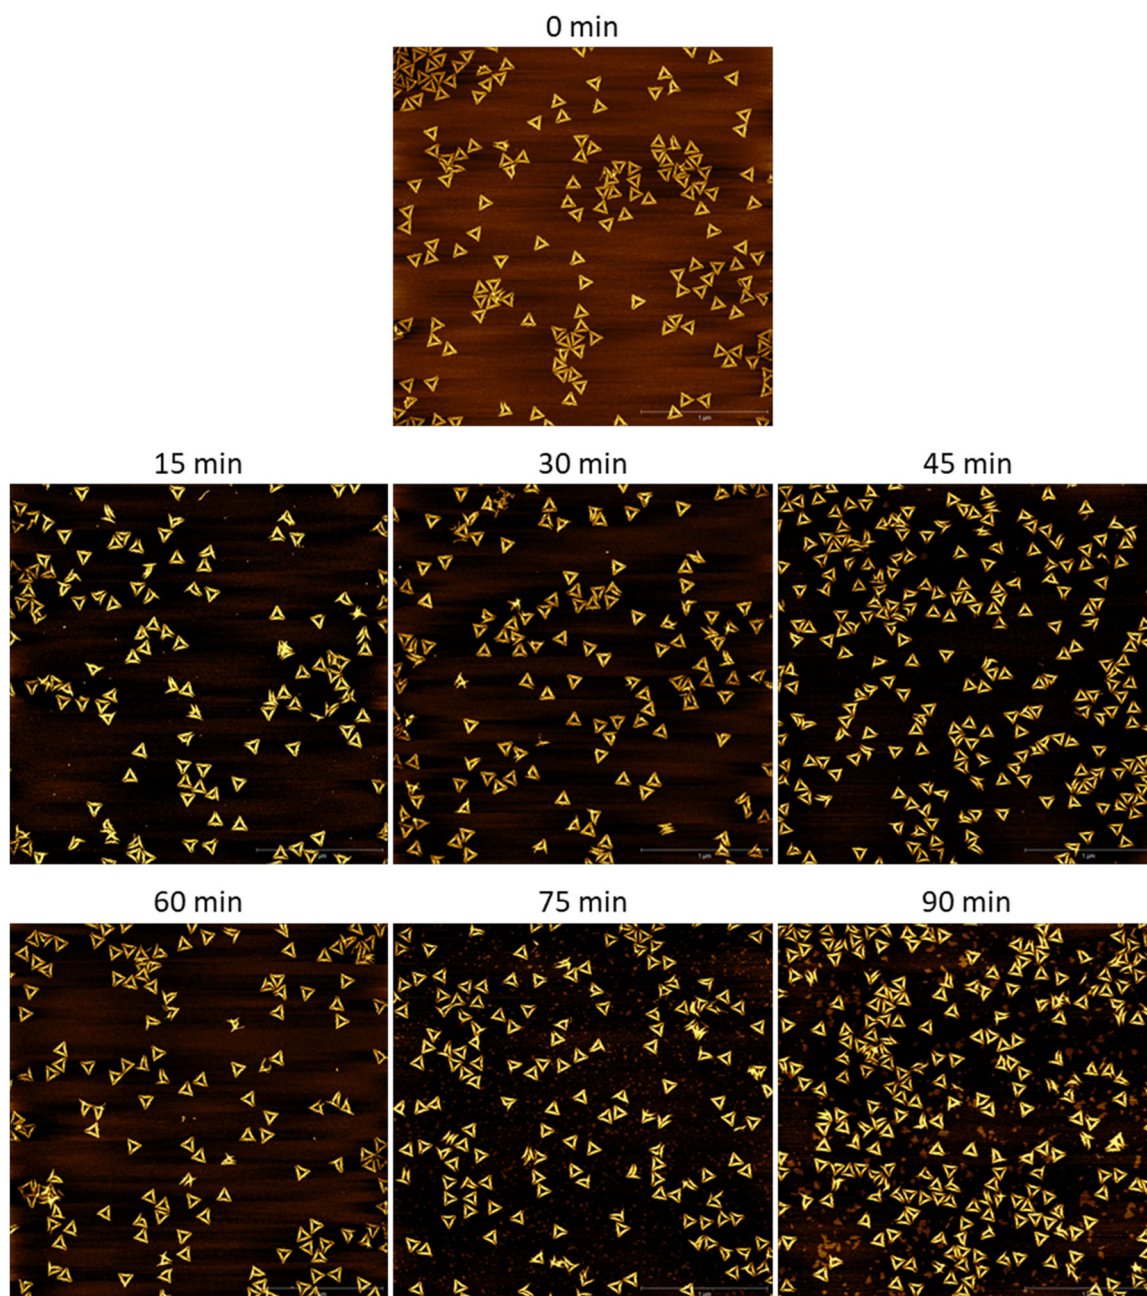

**Figure S3:** Additional AFM images of DNA origami triangles exposed to GdmCl at 50 °C.

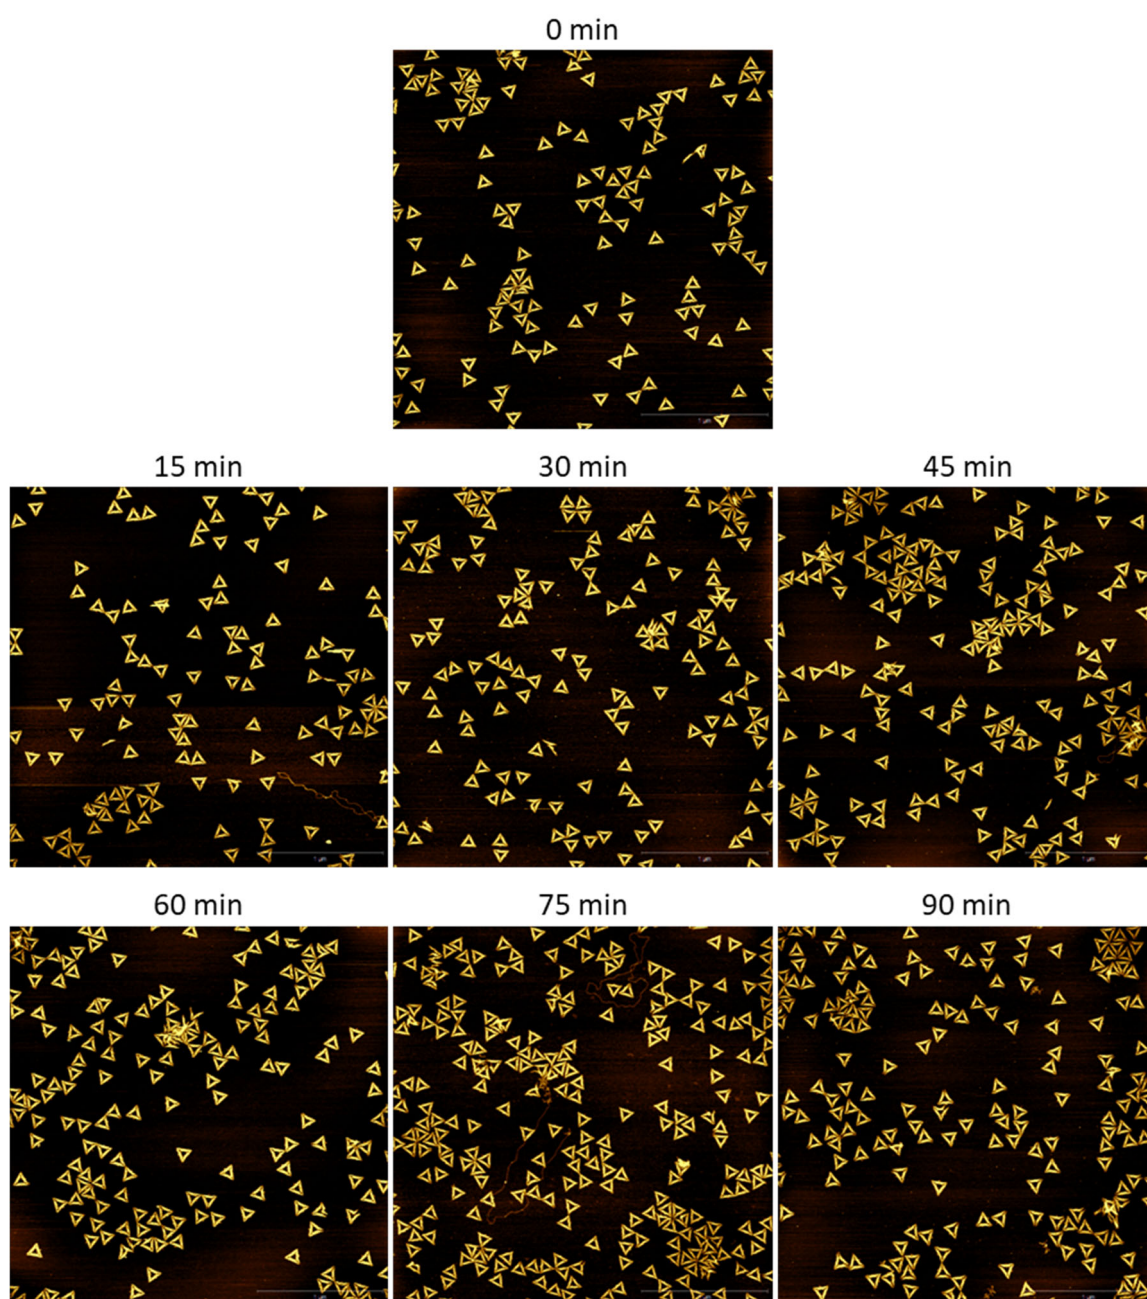

**Figure S4:** Additional AFM images of DNA origami triangles exposed to  $\text{Gdm}_2\text{SO}_4$  at 25 °C.

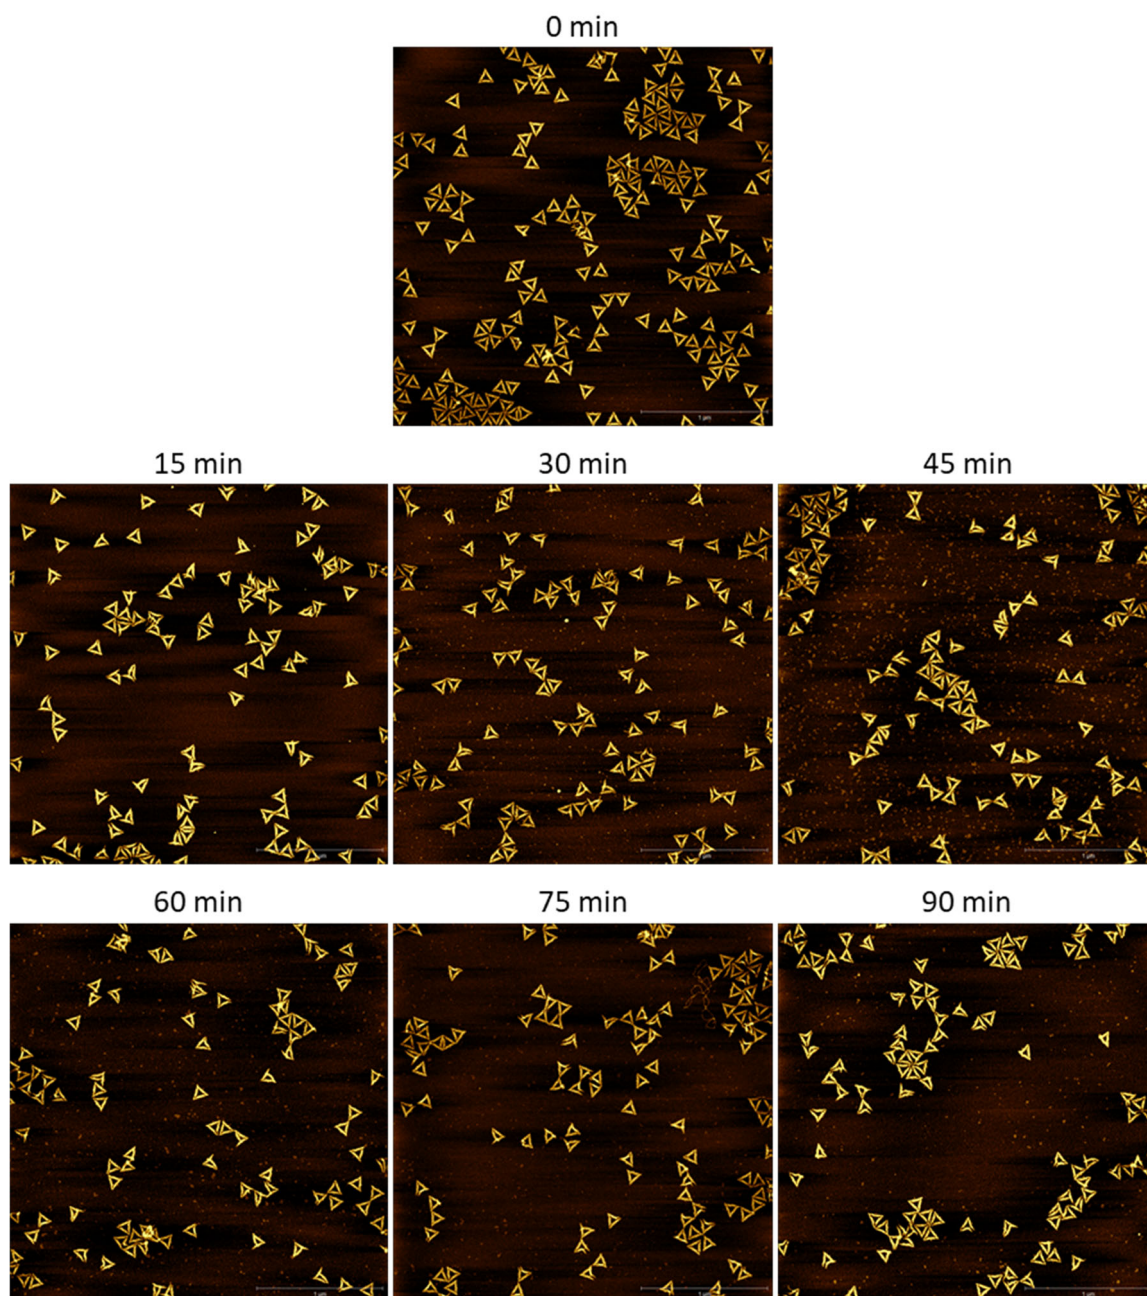

**Figure S5:** Additional AFM images of DNA origami triangles exposed to  $\text{Gdm}_2\text{SO}_4$  at 40 °C.

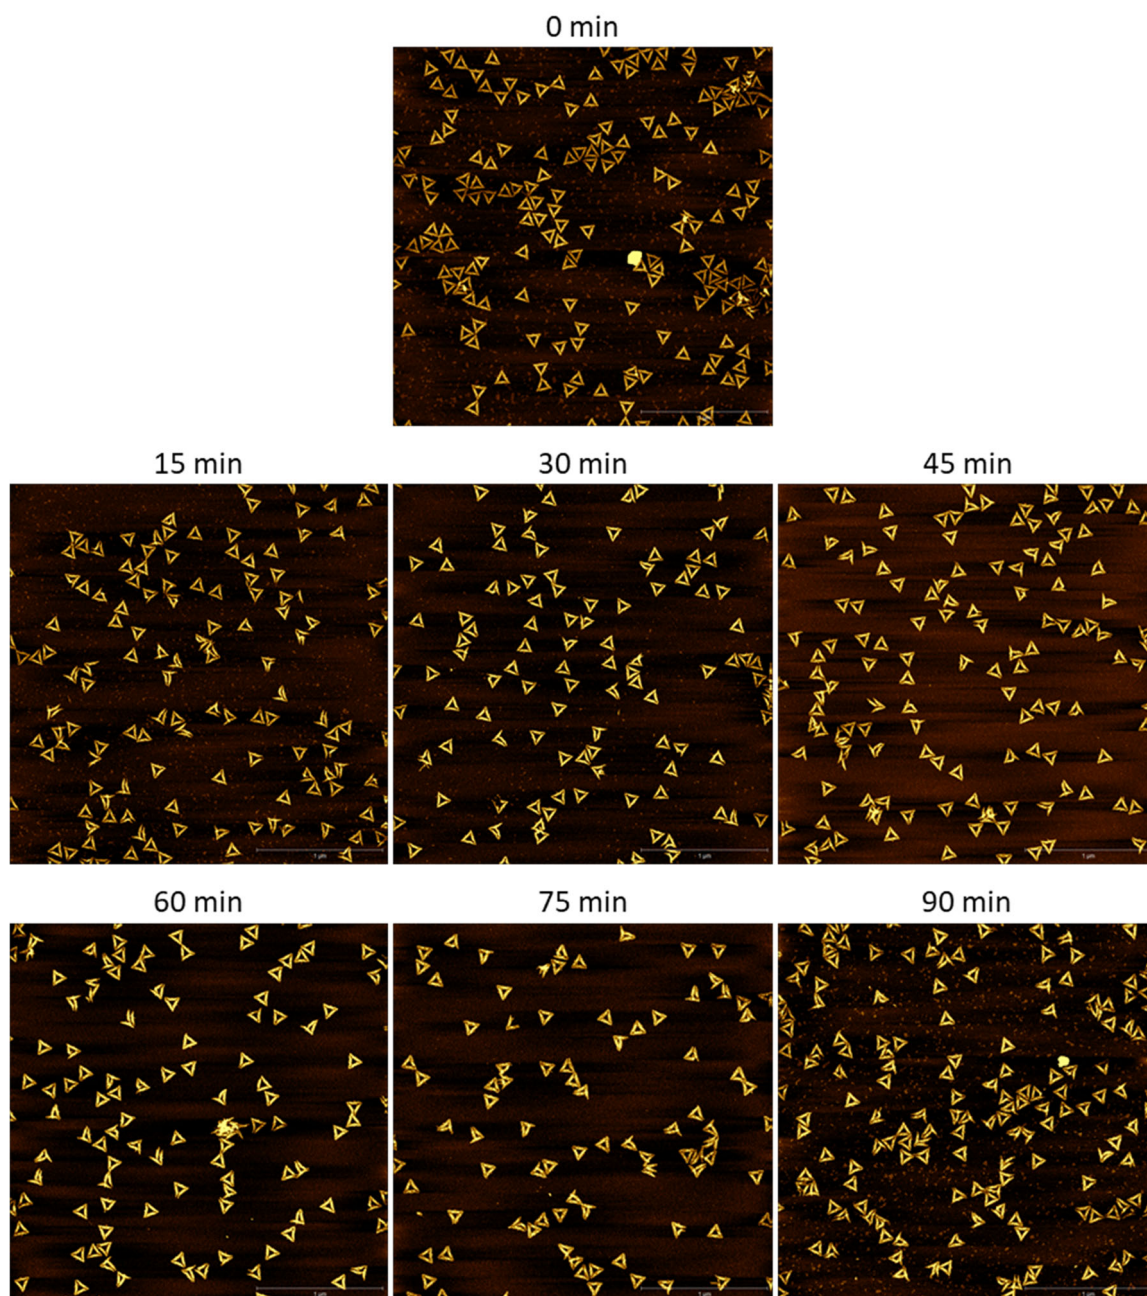

**Figure S6:** Additional AFM images of DNA origami triangles exposed to  $\text{Gdm}_2\text{SO}_4$  at 50 °C.

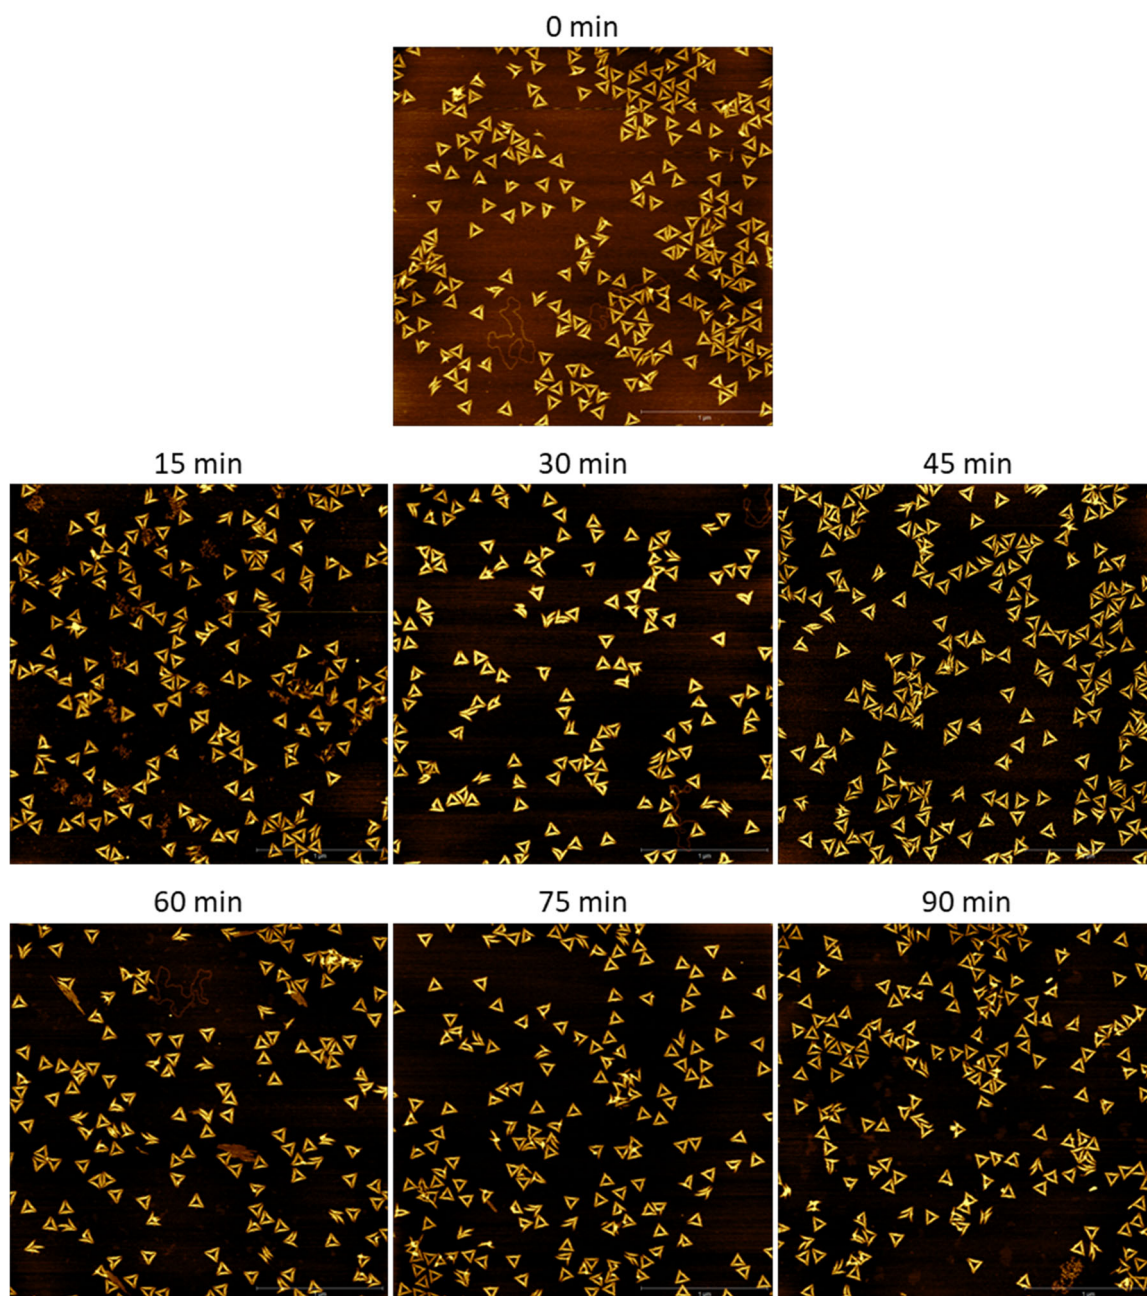

**Figure S7:** Additional AFM images of DNA origami triangles exposed to GdmSCN at 25 °C.

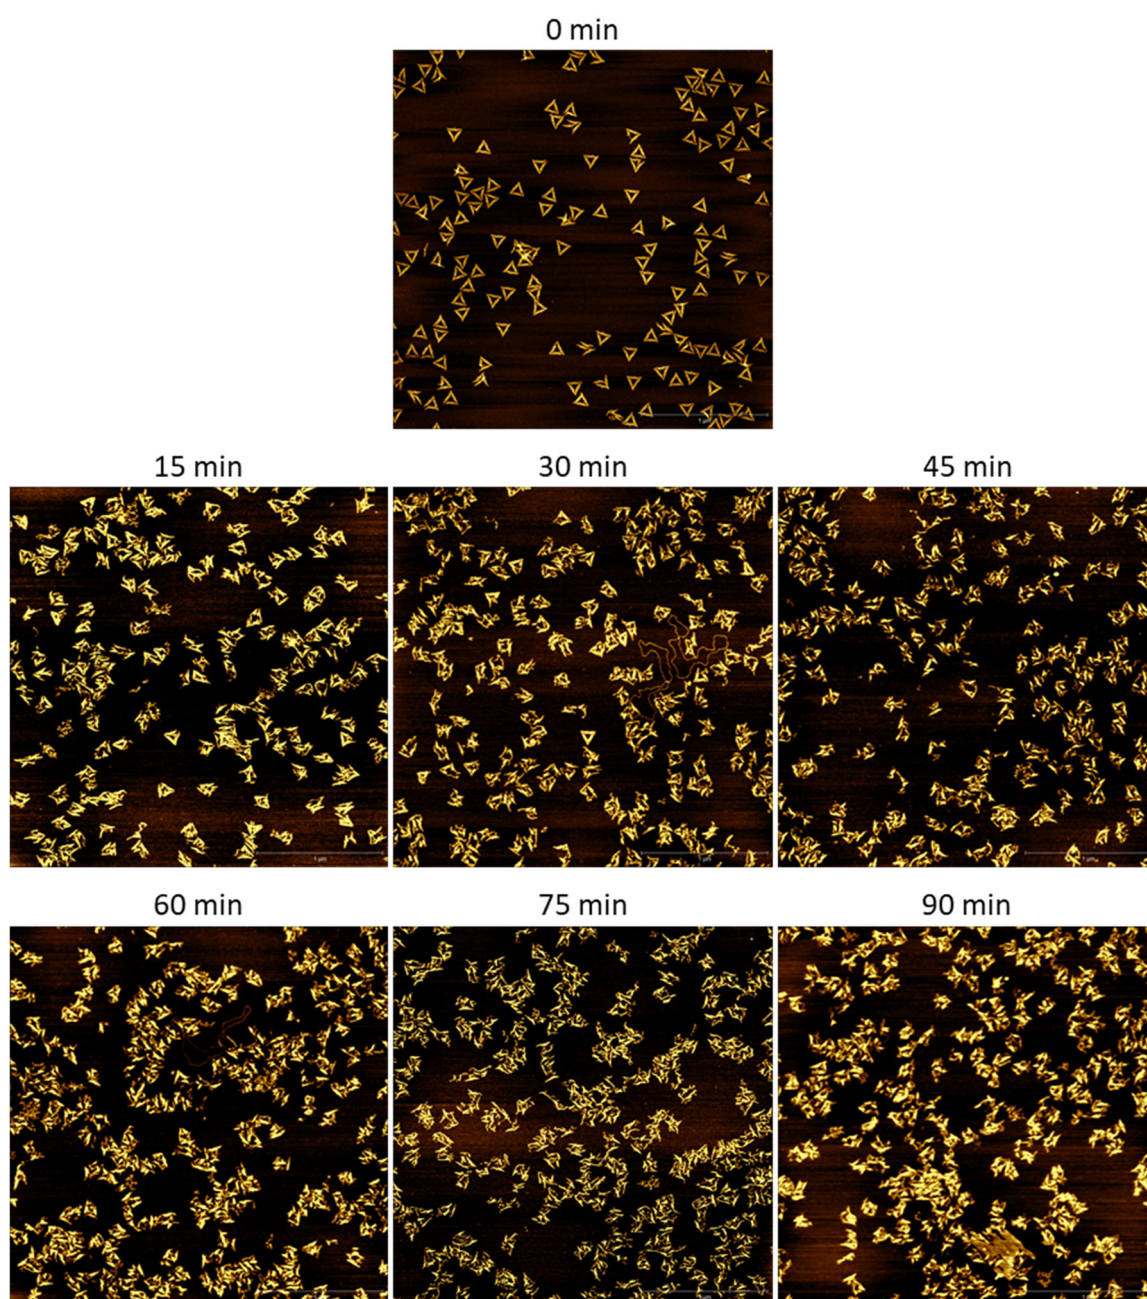

**Figure S8:** Additional AFM images of DNA origami triangles exposed to GdmSCN at 40 °C.

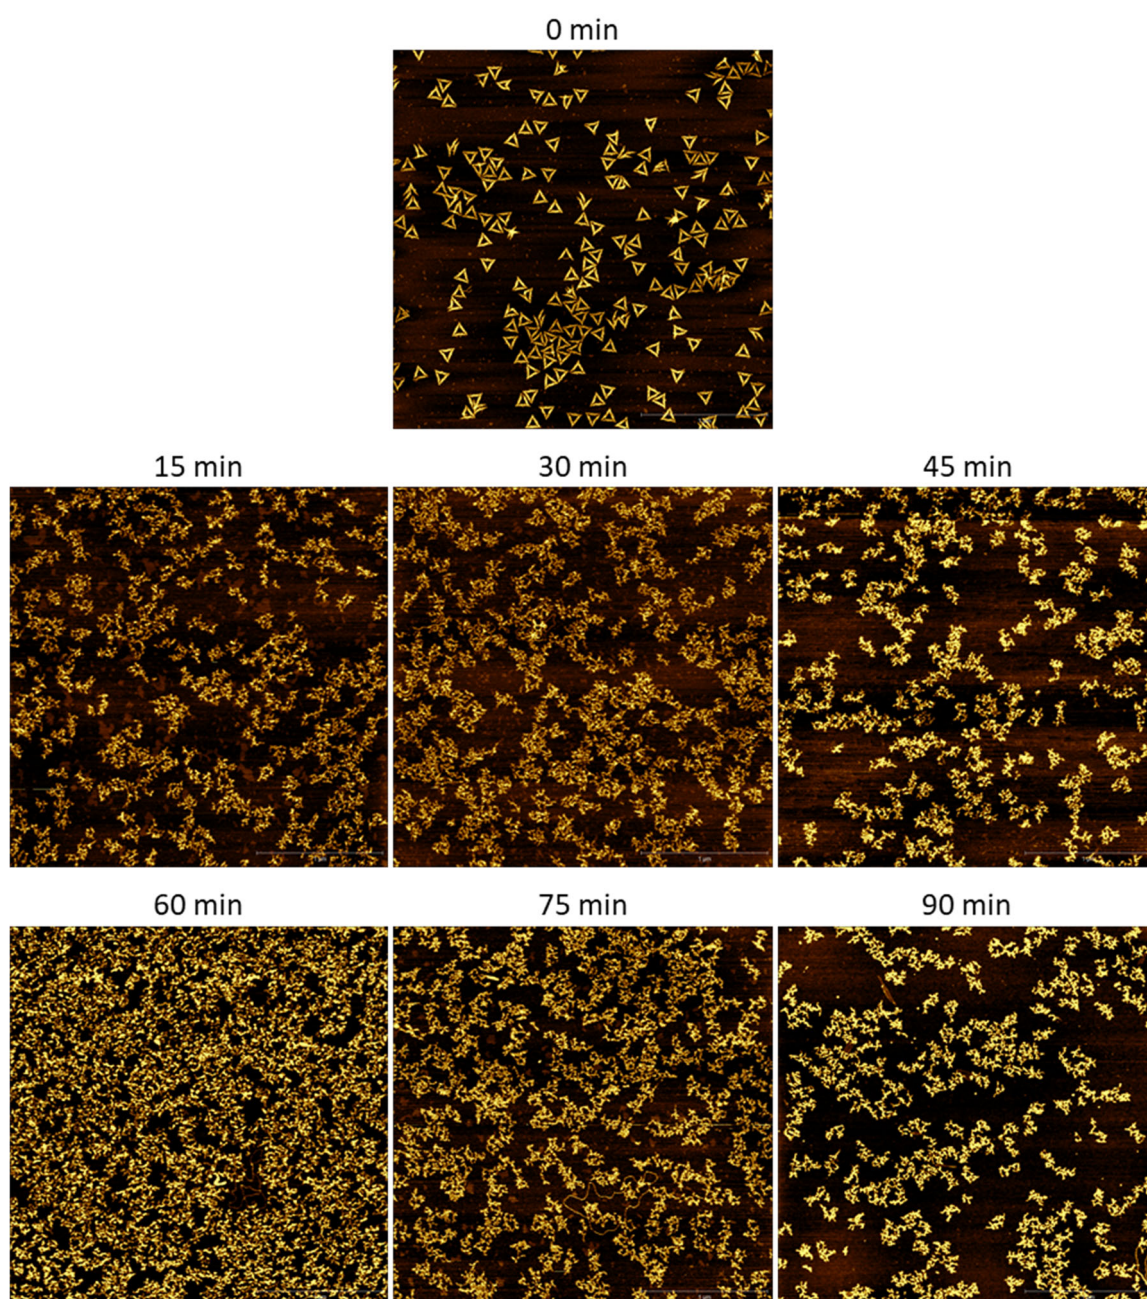

**Figure S9:** Additional AFM images of DNA origami triangles exposed to GdmSCN at 50 °C.
